# Supplementary material for: Identification and characterisation of enteroaggregative Escherichia coli subtypes associated with human disease
Source: PubMed Central journal article supplement (PMC7198487; doi:10.1038/s41598-020-64424-3), 2020-05-04
Supplement: 41598_2020_64424_MOESM1_ESM.pdf [file 41598_2020_64424_MOESM1_ESM.pdf]

**Identification and characterisation of enteroaggregative *Escherichia coli* subtypes associated with human disease**

Samuel J. Ellis<sup>1,2</sup>, Lisa C. Crossman<sup>3,4</sup>, Conor J. McGrath<sup>1,2</sup>, Marie A. Chattaway<sup>5</sup>, Johanna M. Hölken<sup>1,2</sup>, Bernard Brett<sup>6</sup>, Leah Bundy<sup>3</sup>, Gemma L. Kay<sup>1,2</sup>, John Wain<sup>1,2</sup>, and Stephanie Schüller<sup>1,2\*</sup>

**Table S1:** Strains used in this study

| Strain  | Isolated from | ST | Source <sup>a</sup> | Year | Country |
|---------|---------------|----|---------------------|------|---------|
| 042     | Case          | 31 | PHE                 | 1985 | Peru    |
| E099975 | Control       | 31 | IID1                | 1994 | UK      |
| E103617 | Case          | 31 | IID1                | 1994 | UK      |
| E104931 | Control       | 31 | IID1                | 1994 | UK      |
| E104940 | Control       | 31 | IID1                | 1994 | UK      |
| E104946 | Case          | 31 | IID1                | 1994 | UK      |
| E104967 | Case          | 31 | IID1                | 1994 | UK      |
| E104969 | Control       | 31 | IID1                | 1994 | UK      |
| E107526 | Case          | 31 | IID1                | 1994 | UK      |
| E107759 | Control       | 40 | IID1                | 1995 | UK      |
| E109907 | Control       | 40 | IID1                | 1995 | UK      |
| 1091    | Case          | 40 | IID2                | 2008 | UK      |
| 1337    | Case          | 40 | IID2                | 2008 | UK      |
| 146052  | Case          | 40 | PHE                 | 2015 | UK      |
| 153145  | Case          | 40 | PHE                 | 2015 | UK      |
| 221654  | Case          | 40 | PHE                 | 2016 | UK      |
| 232736  | Case          | 40 | PHE                 | 2016 | UK      |

<sup>a</sup> Population-based study of infectious intestinal disease (IID), Public Health England (PHE)

**Table S2:** Additional ST31 and ST40 strains used for genotypic analysis. All strains were isolated from human faeces in the UK. Serotypes have been determined from sequence data.

| Strain  | ST | serotype | Source | Year |
|---------|----|----------|--------|------|
| 147807  | 31 | O157:H7  | PHE    | 2015 |
| 158896  | 31 | O130:H27 | PHE    | 2015 |
| 206714  | 31 | O15:H18  | PHE    | 2016 |
| 333909  | 31 | O130:H27 | PHE    | 2017 |
| 333915  | 31 | O130:H27 | PHE    | 2017 |
| 358016  | 31 | O130:H27 | PHE    | 2017 |
| 437050  | 31 | O15:H18  | PHE    | 2017 |
| 452448  | 31 | O111:H21 | PHE    | 2017 |
| 503548  | 31 | O130:H27 | PHE    | 2018 |
| 573601  | 31 | O130:H27 | PHE    | 2018 |
| E071341 | 31 | O130:H27 | IID1   | 1991 |
| E096485 | 31 | O130:H27 | IID1   | 1994 |
| E097501 | 31 | O175:H27 | IID1   | 1994 |
| E097502 | 31 | O130:H27 | IID1   | 1994 |
| E099970 | 31 | O3:H2    | IID1   | 1994 |
| E100875 | 31 | O25:H2   | IID1   | 1994 |
| E101091 | 31 | O130:H27 | IID1   | 1994 |
| E101092 | 31 | O25:H2   | IID1   | 1994 |
| E101093 | 31 | O130:H33 | IID1   | 1994 |
| E101095 | 31 | O130:H27 | IID1   | 1994 |
| E101096 | 31 | O130:H27 | IID1   | 1994 |
| E101097 | 31 | O130:H27 | IID1   | 1994 |

|         |    |          |      |      |
|---------|----|----------|------|------|
| E103626 | 31 | O176:H33 | IID1 | 1994 |
| E104929 | 31 | O62:H30  | IID1 | 1994 |
| E107247 | 31 | O17:H18  | IID1 | 1994 |
| E107754 | 31 | O130:H27 | IID1 | 1995 |
| E108689 | 31 | O92:H33  | IID1 | 1995 |
| E108837 | 31 | O130:H27 | IID1 | 1995 |
| E108839 | 31 | O130:H27 | IID1 | 1995 |
| E109906 | 31 | O25:H2   | IID1 | 1995 |
| E110852 | 31 | O86:H18  | IID1 | 1995 |
| 657     | 40 | O111:H21 | IID2 | 2008 |
| 767     | 40 | O111:H21 | IID2 | 2008 |
| 1150    | 40 | O111:H21 | IID2 | NA   |
| E094706 | 40 | O111:H21 | IID1 | 1994 |
| E105354 | 40 | O176:H29 | IID1 | 1994 |
| E105393 | 40 | O154:H21 | IID1 | 1994 |
| E109634 | 40 | O25:H2   | IID1 | 1995 |
| E109902 | 40 | O92:H33  | IID1 | 1995 |

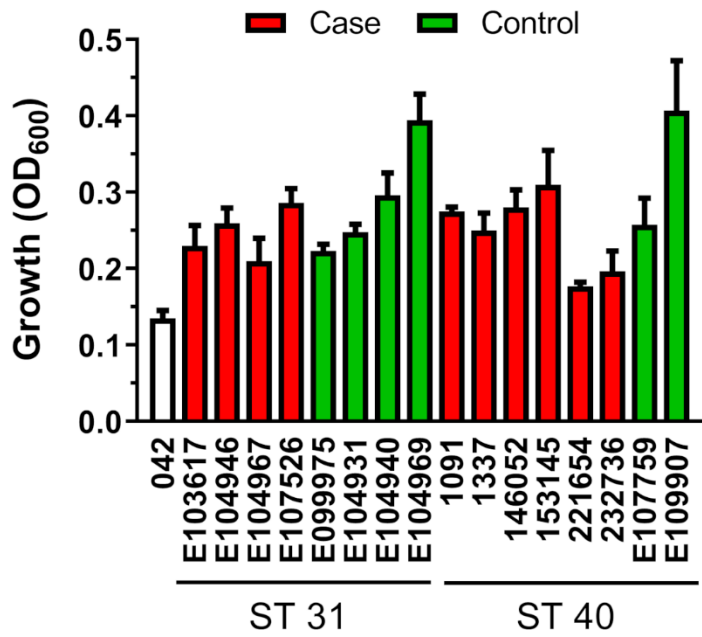

**Supplementary Fig. S1:** EAEC growth in DMEM/F-12 medium. Bacterial overnight cultures diluted to OD 0.01 in DMEM/F-12 medium were incubated for 2 h. Results represent the mean  $\pm$  SE from three independent experiments. Data from groups of ST31 and ST40 isolates were analysed using Student's unpaired t-test.

042

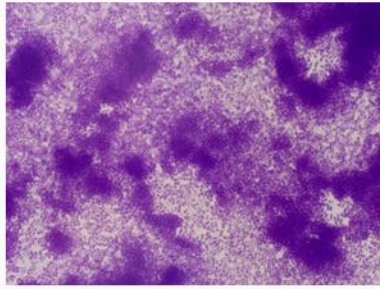

ST31

E107526

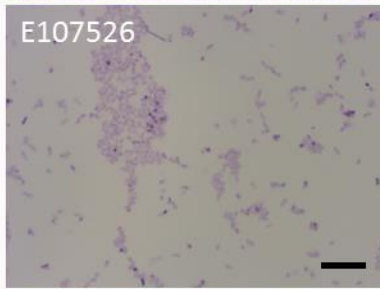

E103617

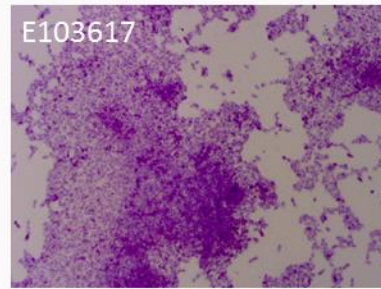

E104969

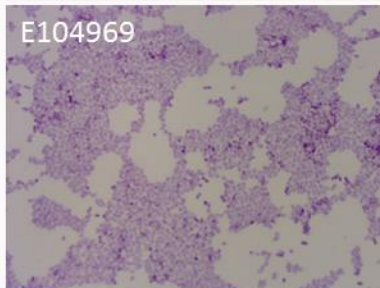

E104940

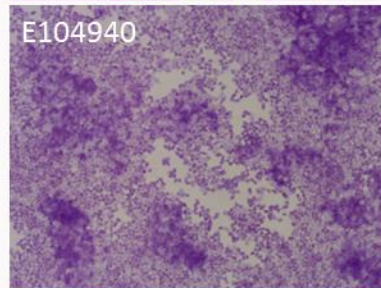

ST40

1337

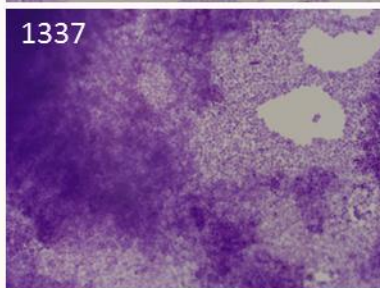

E107759

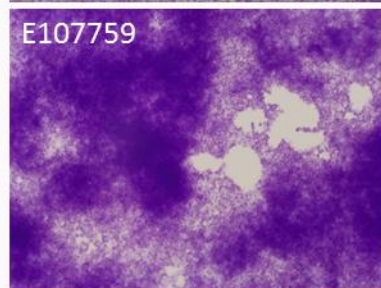

1091

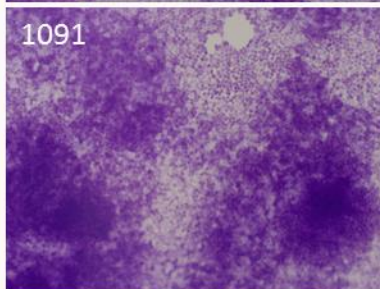

E109907

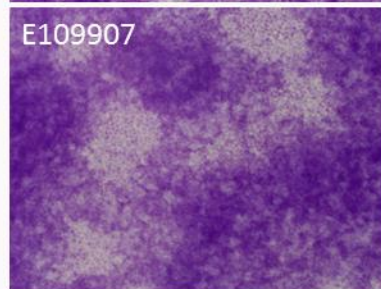

**Supplementary Fig. S2:** Brightfield microscopy of EAEC biofilms stained with crystal violet. Scale bar = 10  $\mu$ m.

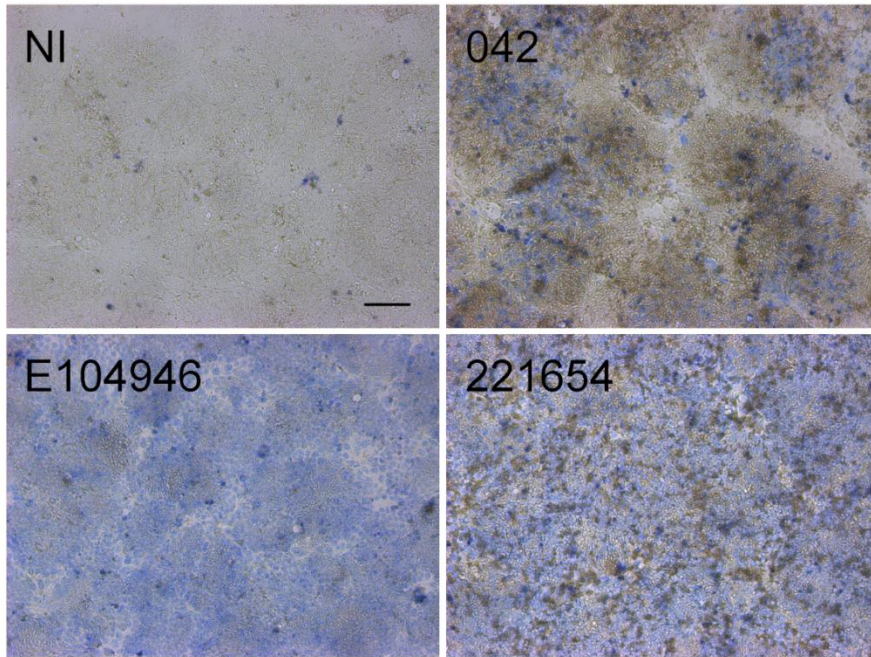

**Supplementary Fig. S3:** Monolayer preservation after Trypan Blue stain. Confluent T84 cells were infected with EAEC 042, E104946, 221654 or left non-infected (NI) for 8 h. Cells were subsequently stained with Trypan Blue to assess EAEC cytotoxicity. Bar = 50  $\mu$ m.
